# Supplementary material
Source: Springer Nature journal article supplement (https://www.springermedizin.de/resource/supplementary/12974_2011_412_MOESM2_ESM.pdf/9601232)

**CONTROL**

**HIV-1 Tg**

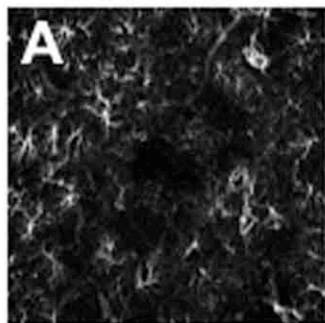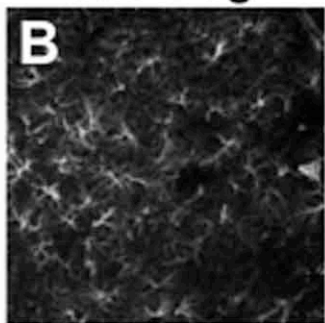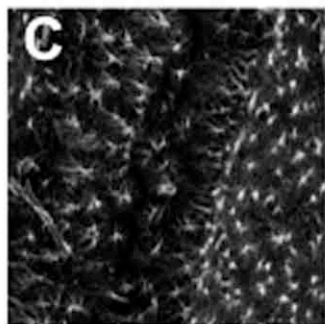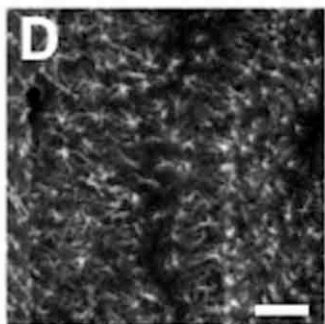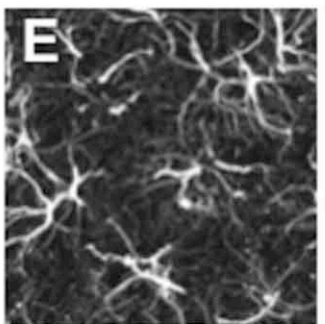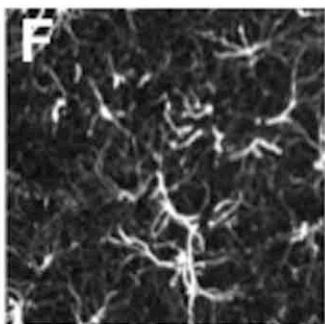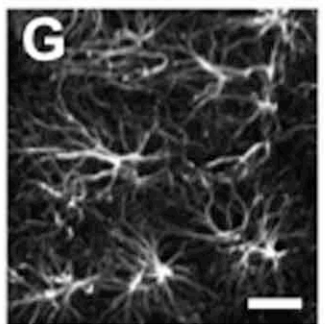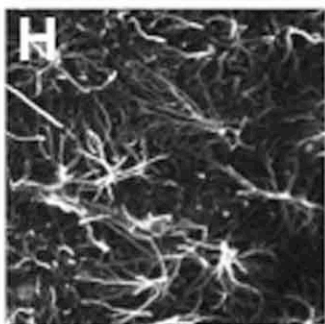

Supplement: MOESM2 [file 9601232]
